# Supplementary material for: Associations between previous local health expenditures and COVID-19 mortality outcomes large cities in the United States: Results from a forward-selecting linear regression analysis
Source: Research Square preprint supplement (doi:10.21203/rs.3.rs-6197553/v1), 2025-03-26
Supplement: Supplementary file 1 [file 7a02bb84bb8b62426cd7579b.docx]

**Appendix 1. Sensitivity Analyses.**

**Table S1. Summary statistics for independent variables used in sensitivity analyses (n=50).**

| Variable | Mean (SD) | Min, Max |
| --- | --- | --- |
| Average local health expenditures per capita (2019) | 0.31 (0.44) | 0.01, 2.38 |
| Average local health expenditures per capita (2017–2019) | 0.31 (0.43) | 0.01, 2.31 |

**Table S2. Coefficients from linear regression models investigating the effects of average three-year local public health expenditures (2017–2019) on the natural log of excess mortality per 100,000 persons.**

| Variable | Model 1 | Model 2 | Model 3 | Model 4 |
| --- | --- | --- | --- | --- |
| LE | LE+D | LE+D+SES | LE+D+SES+PR |
| Local health expenditures | -0.000 | -0.000 | -0.000 | -0.000 |
| Population density |  | **0.035 | *0.026 | 0.014 |
| Elderly population |  | *0.056 | -0.006 | 0.016 |
| White population |  | -0.006 | 0.001 | 0.003 |
| Smoking |  | **0.063 | 0.037 | 0.011 |
| Obesity |  | 0.004 | -0.028 | -0.018 |
| Institutionalized population |  | 0.000 | 0.000 | 0.000 |
| Household income |  |  | -0.008 | -0.008 |
| Income inequality |  |  | 0.103 | 0.104 |
| Education |  |  | *-0.022 | **-0.022 |
| Insurance status |  |  | -0.001 | 0.010 |
| CDC Social Vulnerability Index |  |  | 0.300 | 0.204 |
| Reported COVID-19 case rate |  |  |  | **0.370 |
| Number of observations | 50 | 50 | 50 | 50 |
| Adjusted R-squared | 0.035 | 0.420 | 0.594 | 0.659 |

Local expenditures (LE); Demographics considerations (D); Socioeconomic considerations (SES); Pandemic response considerations (PR) | ** p<.05, * p<.10

**Table S3. Coefficients from linear regression models investigating the effects of local public health expenditures (2019) on the natural log of excess mortality per 100,000 persons.**

| Variable | Model 1 | Model 2 | Model 3 | Model 4 |
| --- | --- | --- | --- | --- |
| LE | LE+D | LE+D+SES | LE+D+SES+PR |
| Local health expenditures | *-0.000 | *-0.000 | -0.000 | -0.000 |
| Population density |  | **0.035 | *0.026 | 0.014 |
| Elderly population |  | *0.058 | -0.005 | 0.016 |
| White population |  | -0.006 | 0.001 | 0.003 |
| Smoking |  | *0.062 | 0.038 | 0.012 |
| Obesity |  | 0.003 | -0.029 | -0.018 |
| Institutionalized population |  | 0.000 | 0.000 | 0.000 |
| Household income |  |  | -0.007 | -0.007 |
| Income inequality |  |  | 0.102 | 0.104 |
| Education |  |  | *-0.023 | **-0.022 |
| Insurance status |  |  | -0.001 | 0.010 |
| CDC Social Vulnerability Index |  |  | 0.315 | 0.210 |
| Reported COVID-19 case rate |  |  |  | **0.369 |
| Number of observations | 50 | 50 | 50 | 50 |
| Adjusted R-squared | 0.046 | 0.421 | 0.595 | 0.660 |

Local expenditures (LE); Demographics considerations (D); Socioeconomic considerations (SES); Pandemic response considerations (PR) | ** p<.05, * p<.10

**Table S4. Coefficients from linear regression models investigating the effects of average three-year local public health expenditures (2017–2019) on reported COVID-19 mortality per 100,000 persons.**

| Variable | Model 1 | Model 2 | Model 3 | Model 4 |
| --- | --- | --- | --- | --- |
| LE | LE+D | LE+D+SES | LE+D+SES+PR |
| Local health expenditures | **-0.039 | **-0.036 | -0.014 | -0.003 |
| Elderly population |  | **7.912 | 4.283 | 6.466 |
| White population |  | **-0.925 | -0.297 | -0.069 |
| Smoking |  | 2.627 | -1.781 | -4.326 |
| Obesity |  | 0.704 | -1.159 | 0.358 |
| Household income |  |  | *-2.004 | *-1.970 |
| Income inequality |  |  | 15.513 | 10.883 |
| Education |  |  | -0.929 | -0.626 |
| Uninsured |  |  | 0.437 | 1.702 |
| CDC Social Vulnerability Index |  |  | -28.872 | -30.032 |
| Reported COVID-19 case rate |  |  |  | **37.873 |
| Number of observations | 50 | 50 | 50 | 50 |
| Adjusted R-squared | 0.102 | 0.278 | 0.411 | 0.478 |

Local expenditures (LE); Demographics considerations (D); Socioeconomic considerations (SES); Pandemic response

considerations (PR) | ** p<.05, * p<.10

**Table S5. Coefficients from linear regression models investigating the effects of local public health expenditures (2019) on reported COVID-19 mortality per 100,000 persons.**

| Variable | Model 1 | Model 2 | Model 3 | Model 4 |
| --- | --- | --- | --- | --- |
| LE | LE+D | LE+D+SES | LE+D+SES+PR |
| Local health expenditures | **-0.040 | **-0.039 | -0.014 | -0.003 |
| Elderly population |  | **8.196 | 4.382 | 6.519 |
| White population |  | **-0.978 | -0.314 | -0.0728 |
| Smoking |  | 2.595 | -1.709 | -4.350 |
| Obesity |  | 0.504 | -1.203 | 0.356 |
| Household income |  |  | *-1.964 | *-1.987 |
| Income inequality |  |  | 15.359 | 10.795 |
| Education |  |  | -0.940 | -0.621 |
| Uninsured |  |  | 0.449 | 1.715 |
| CDC Social Vulnerability Index |  |  | -28.329 | -30.873 |
| Reported COVID-19 case rate |  |  |  | **37.975 |
| Number of observations | 50 | 50 | 50 | 50 |
| Adjusted R-squared | 0.114 | 0.291 | 0.411 | 0.478 |

Local expenditures (LE); Demographics considerations (D); Socioeconomic considerations (SES); Pandemic response

considerations (PR) | ** p<.05, * p<.10
